# Supplementary material
Source: ML conference proceedings conference paper supplement (https://openreview.net/forum?id=qRpP2JGqnK)
Supplement: supplementary_material [file fine-tune-examples.pdf › fine-tune-examples.pdf]

OpenImages Example

DeSRA Example

SR Output

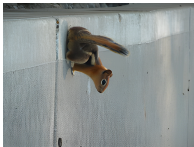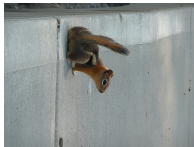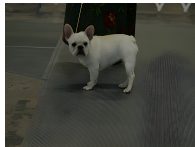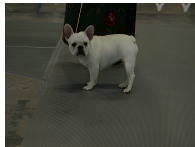

Detected mask

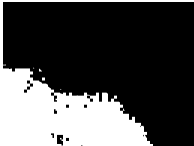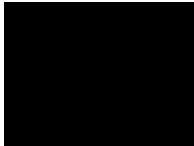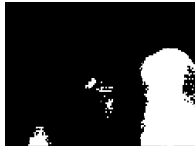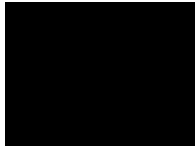

Before Fine-Tuning

After Fine-Tuning

Before Fine-Tuning

After Fine-Tuning
