# Supplementary material
Source: ML conference proceedings conference paper supplement (https://openreview.net/forum?id=qRpP2JGqnK)

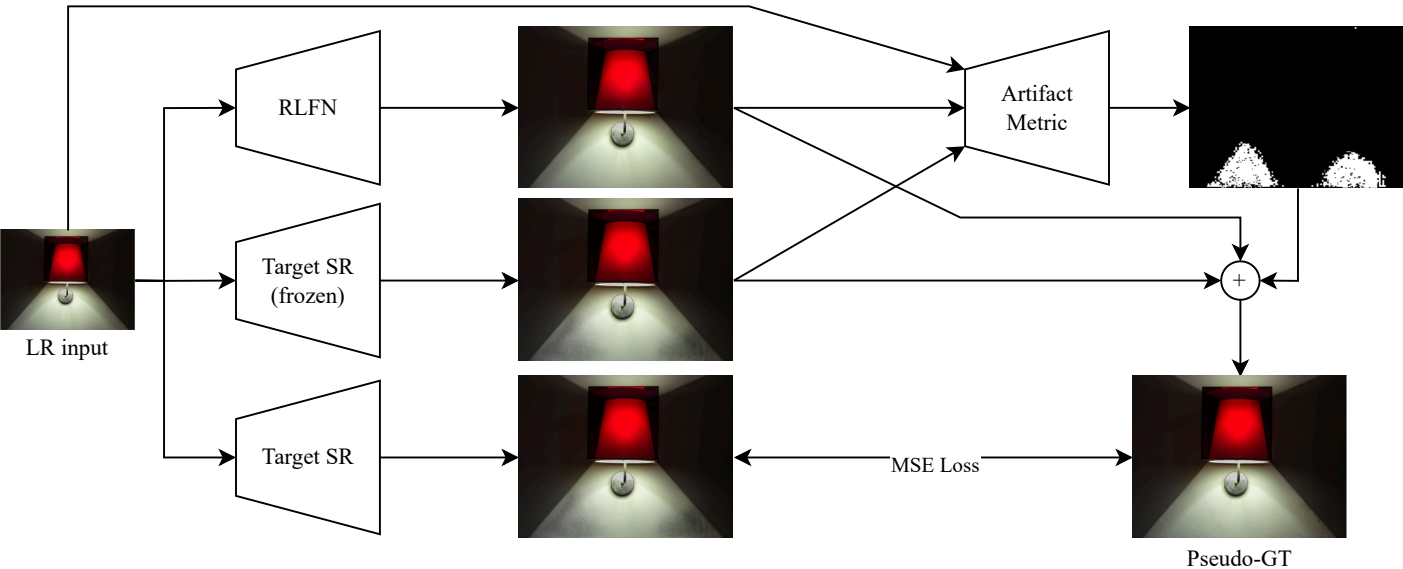

Supplement: supplementary_material [file fine-tune-pipeline.pdf › fine-tune-pipeline.pdf]
